# Supplementary material for: Ti2C3Tx nanosheets as photothermal agents for near-infrared responsive hydrogels
Source: Royal Society of Chemistry journal article supplement (doi:10.1039/c8nr05301d), 2018-01-01
Supplement: c8nr05301d2.pdf [file c8nr05301d2.pdf]

## Supporting information

### **Ti<sub>2</sub>C<sub>3</sub>T<sub>x</sub> Nanosheets as Photothermal Agents for Near-Infrared Responsive Hydrogels**

Changyu Yang, Danyun Xu, WenChao Peng, Yang Li, Guoliang Zhang, Fengbao Zhang, and Xiaobin Fan\*

School of Chemical Engineering and Technology, State Key Laboratory of Chemical Engineering, Collaborative Innovation Center of Chemical Science and Engineering, Tianjin University, Tianjin

300072, China

Email: [xiaobinfan@tju.edu.cn](mailto:xiaobinfan@tju.edu.cn)

#### **1. Determination of lateral size and height distributions**

It can be seen that the lateral size and height distribution based on 28 nanosheets in the histogram. The majority of the MXene nanosheets have a lateral size of 0.5–1 μm and a thickness of 2–4 nm. The deviation of the apparent AFM height of nanosheets should be attributed to the intrinsic ripples of two-dimensional nanosheets,<sup>1,2</sup> as well as the unavoidable presence of trapped solvent under the sheet surfaces.<sup>3,4</sup> In addition, we can also observe many stacked nanosheets in the TEM images (Figure S2).

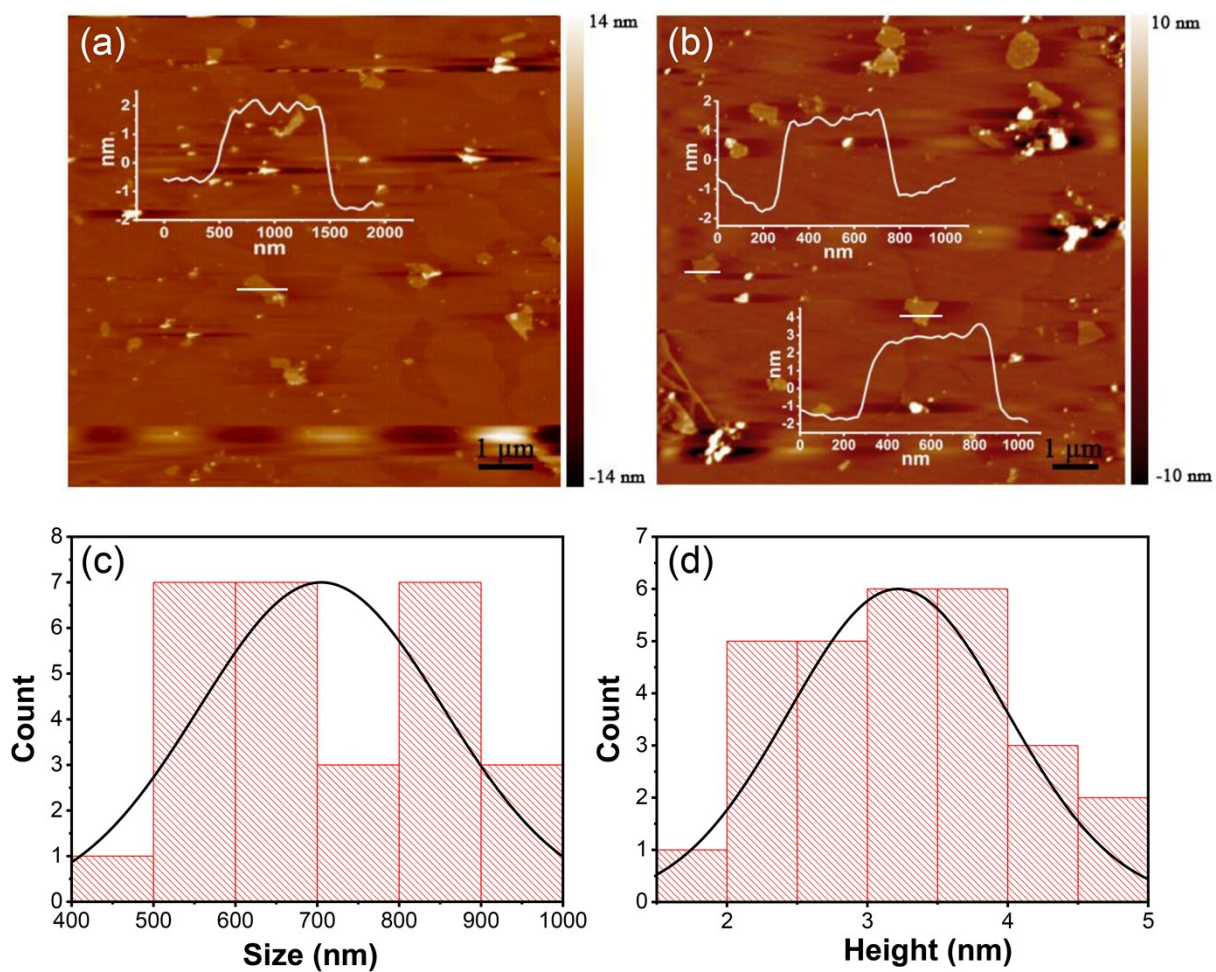

Figure S1. (a)-(b) Typical AFM images, (c) size and (d) height distribution analysis of the  $\text{Ti}_3\text{C}_2\text{T}_x$  nanosheets.

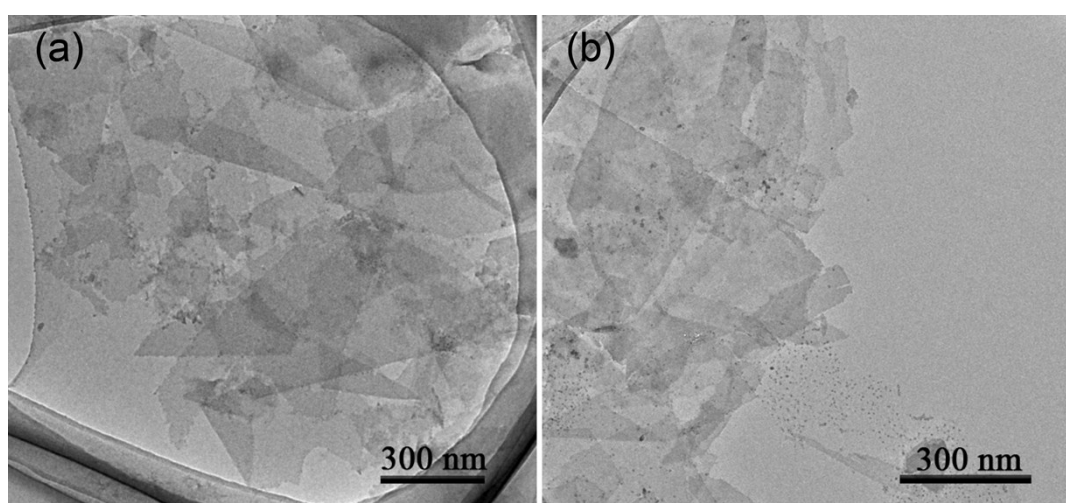

Figure S2. Typical TEM images of the  $\text{Ti}_3\text{C}_2\text{T}_x$  nanosheets.

## 2. UV-vis-NIR absorbance spectra of composite hydrogel

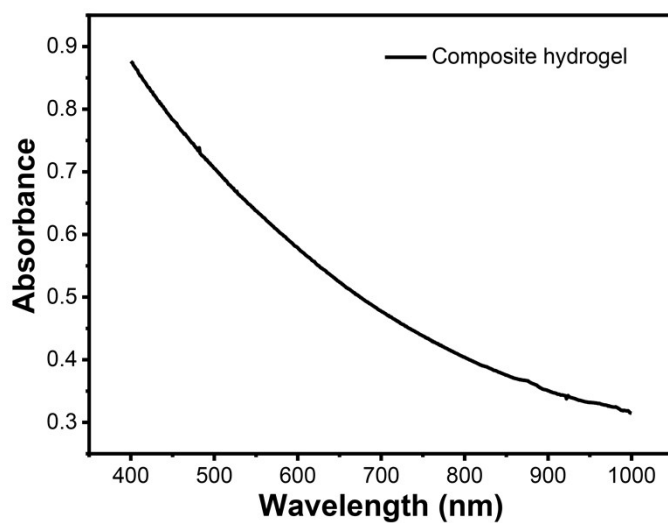

Figure S3. UV-vis-NIR absorbance spectra of composite hydrogel (with  $0.1 \text{ mg ml}^{-1}$   $\text{Ti}_2\text{C}_3\text{T}_x$  nanosheets)

## 3. Calculation of mass extinction coefficient

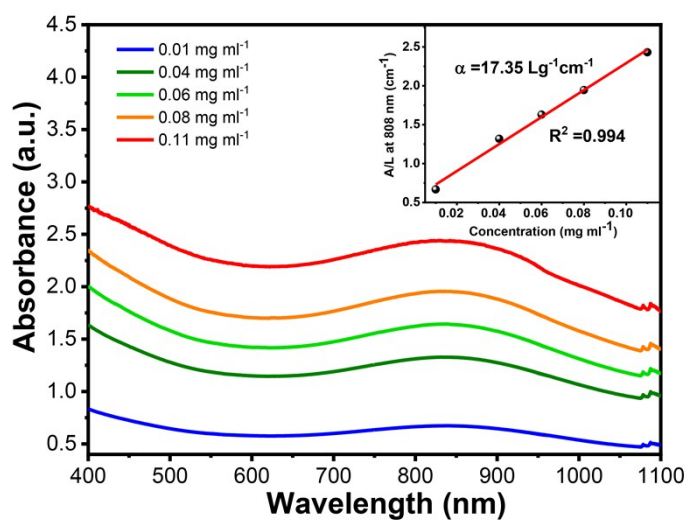

Figure S4. UV-vis-NIR absorbance spectra of  $\text{Ti}_3\text{C}_2\text{T}_x$  nanosheets dispersed in water at different concentrations ( $0.11$ ,  $0.08$ ,  $0.06$ ,  $0.04$ , and  $0.01 \text{ mg ml}^{-1}$ ). Inset: Beer law absorbance plot for absorption at 808 nm.

#### 4. Compression tests

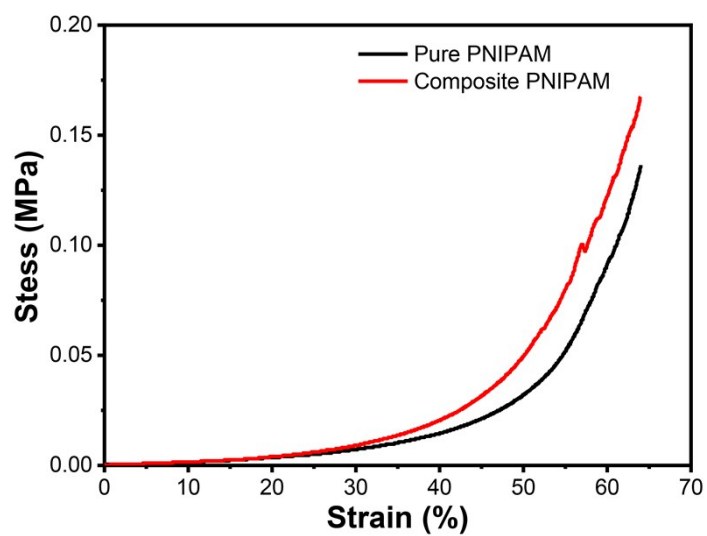

Figure S5. Stress-strain curves of pure PNIPAM and composite PNIPAM hydrogels.

#### 5. Video to demonstrate that the gel-based valve was triggered ON via remotely coupled NIR irradiation

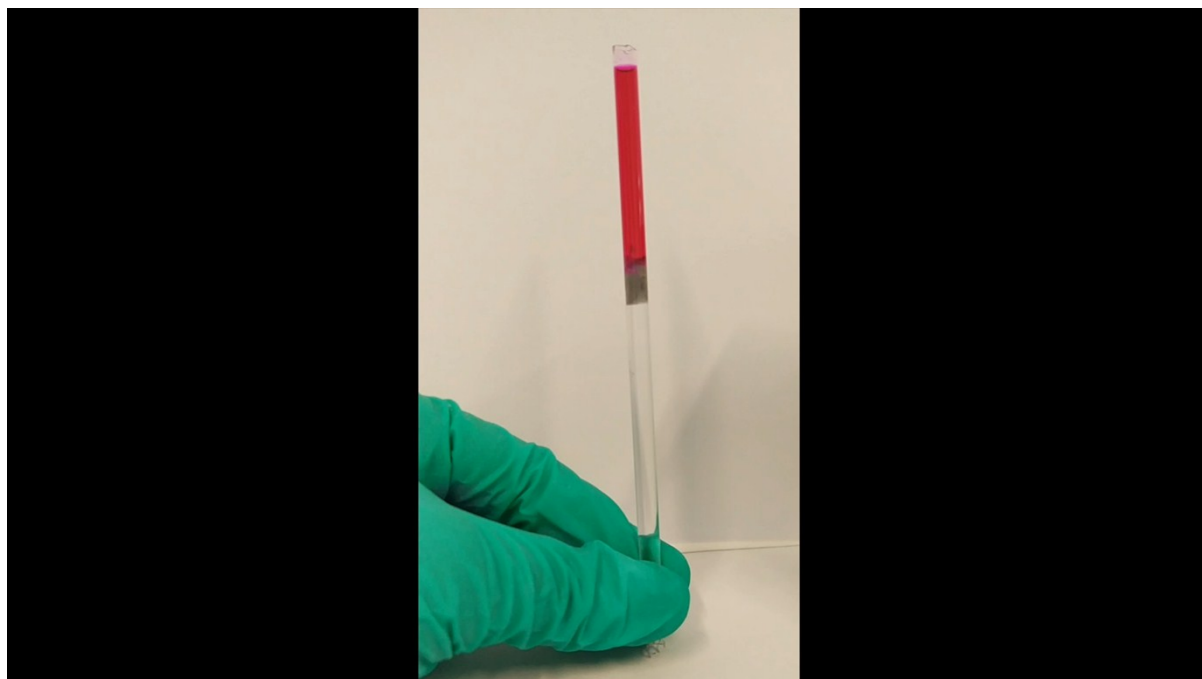

Video 1. Liquid microvalve controlled by NIR radiation (808 nm, 0.8 W)

- 1 R. J. T. Nicholl, H. J. Conley, N. V. Lavrik, I. Vlassiouk, Y. S. Puzyrev, V. P. Sreenivas, S. T. Pantelides and K. I. Bolotin, *Nature Communications*, 2015, **6**, 8789.
- 2 J. Brivio, D. T. L. Alexander and A. Kis, *Nano Lett.*, 2011, **11**, 5148-5153.
- 3 K. Xu, P. Cao and J. R. Heath, *Science*, 2010, **329**, 1188-1191.
- 4 O. Ochedowski, B. K. Bussmann and M. Schleberger, *Scientific reports*, 2014, **4**.
